# Supplementary material for: Mouse parasubthalamic Crh neurons drive alcohol drinking escalation and behavioral disinhibition
Source: PubMed Central journal article supplement — bioRxiv. 2024 Jul 10:2024.07.06.602357. Preprint. [Version 1] doi: 10.1101/2024.07.06.602357 (PMC11257461; doi:10.1101/2024.07.06.602357), 2024-07-10
Supplement: media-1.pdf [file media-1.pdf]

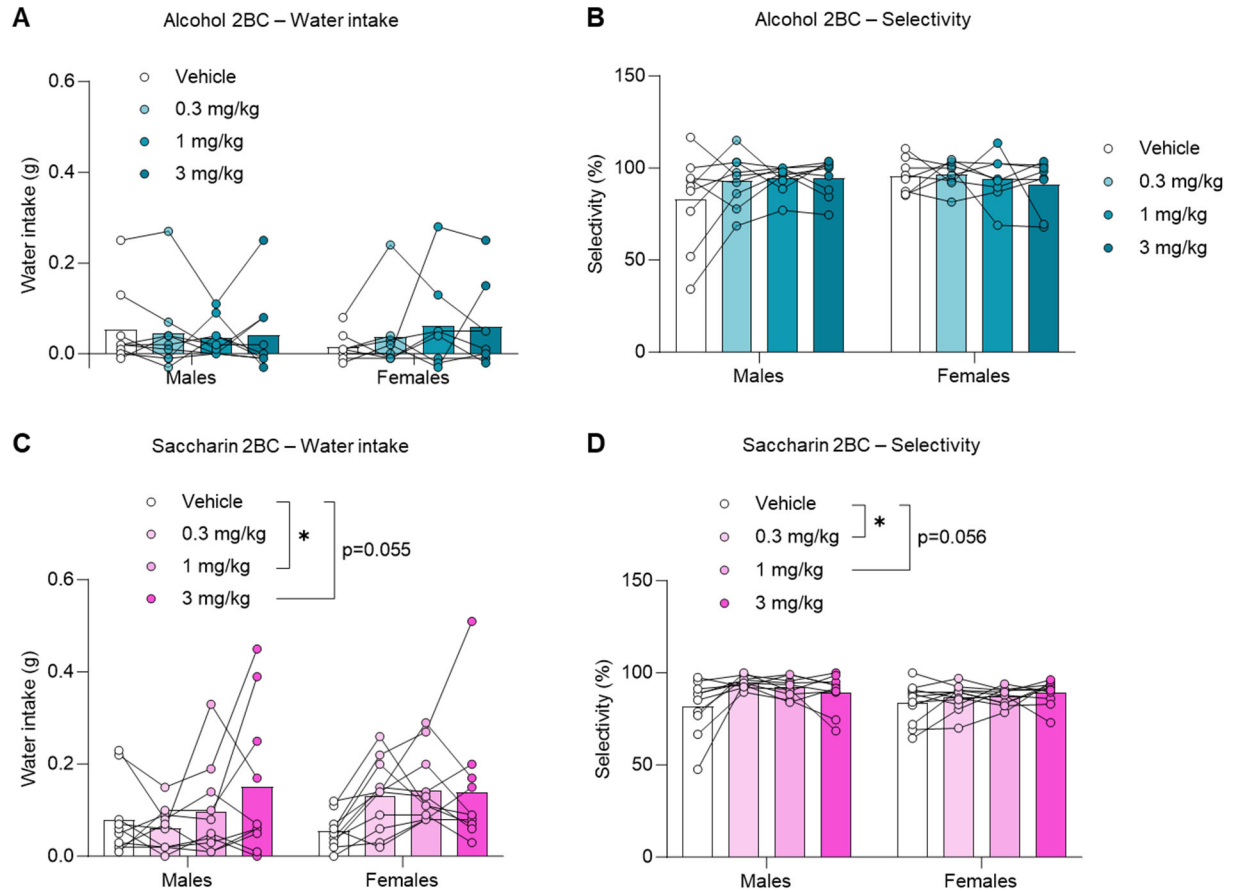

**Supplementary Figure 1.** Water intake (**A, C**) and selectivity (**B, D**) during alcohol (**A-B**) and saccharin (**C-D**) 2BC sessions in Cohort 1. CNO increased water intake and selectivity in the saccharin 2BC assay (\*,  $p < 0.05$ , Dunnett's *posthoc* tests).

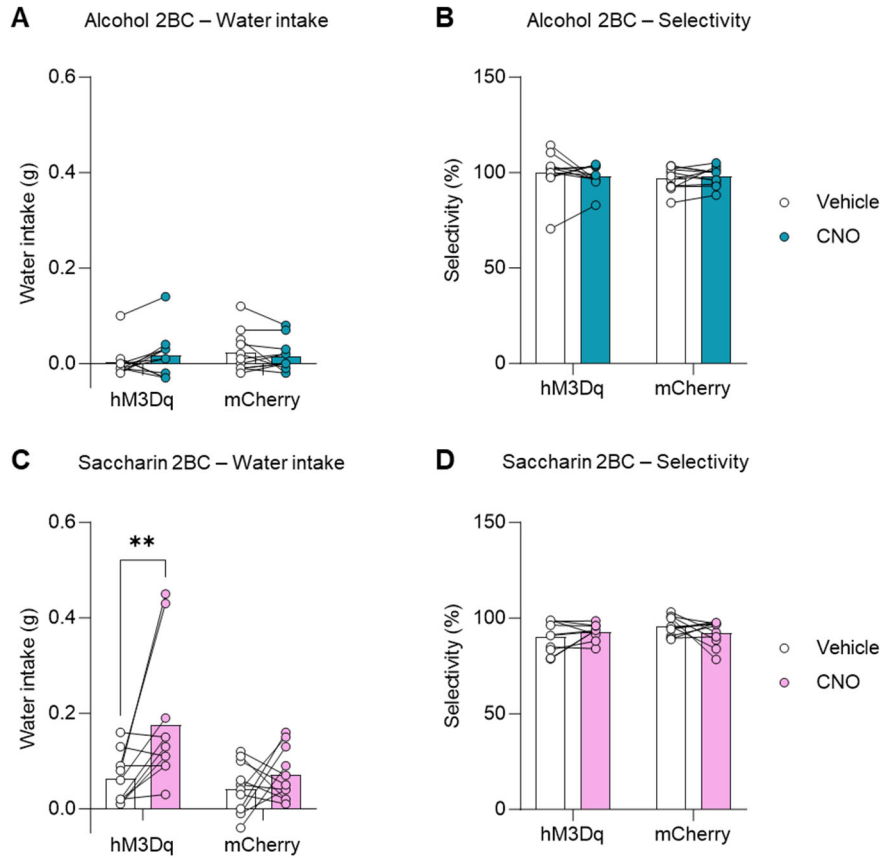

**Supplementary Figure 2.** Water intake (**A, C**) and selectivity (**B, D**) during alcohol (**A-B**) and saccharin (**C-D**) 2BC sessions in Cohort 2. CNO increased water intake in the saccharin 2BC assay (\*\*,  $p < 0.01$ , Šídák's *posthoc* test).

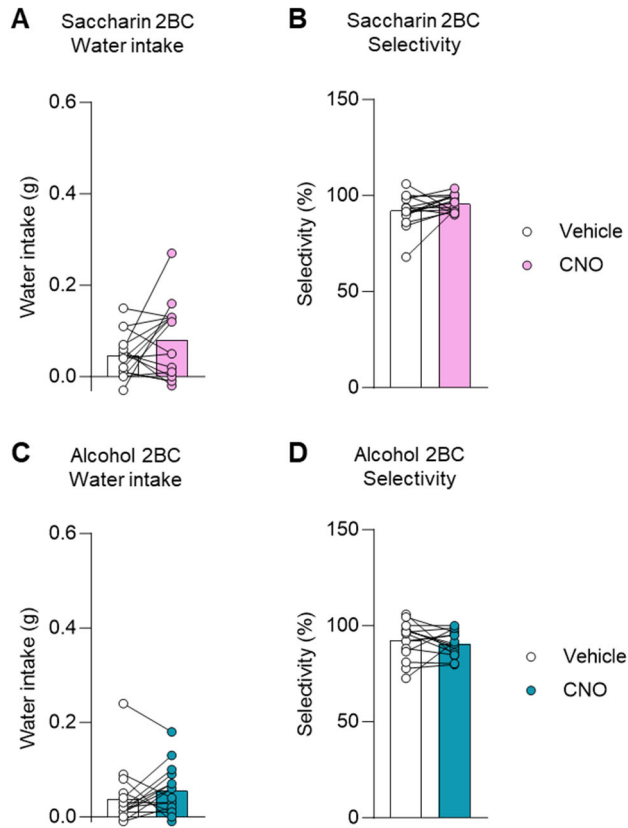

**Supplementary Figure 3.** Water intake (**A, C**) and selectivity (**B, D**) during alcohol (**A-B**) and saccharin (**C-D**) 2BC sessions in Cohort 3. There was no significant effect of CNO on either of these measures (paired t-tests).

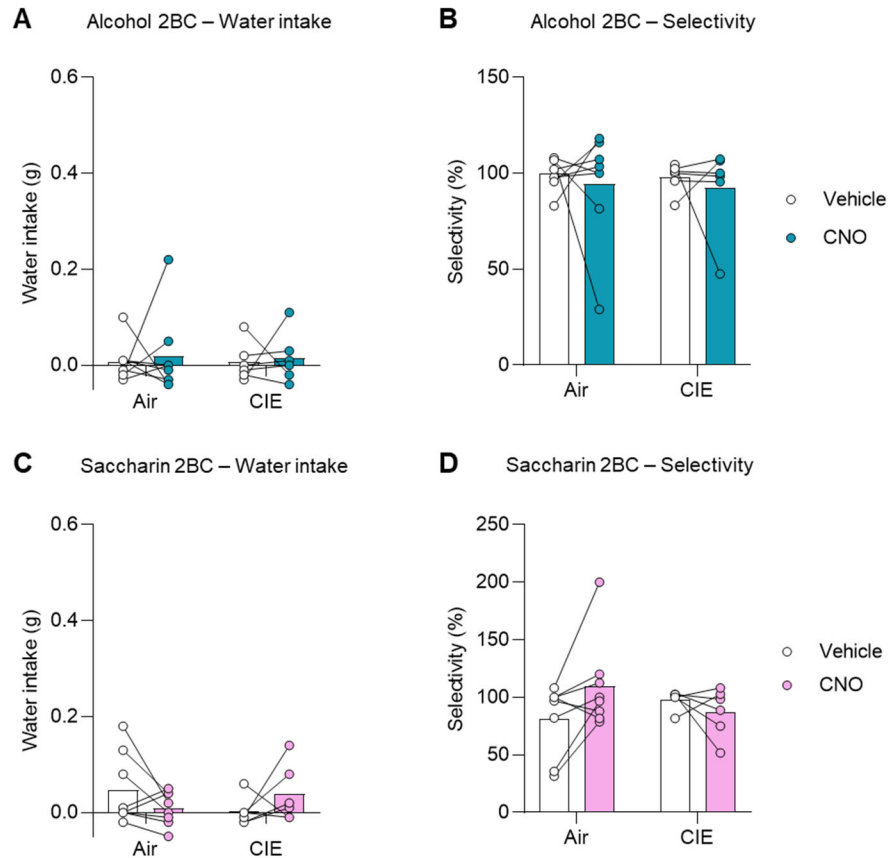

**Supplementary Figure 4.** Water intake (**A, C**) and selectivity (**B, D**) during alcohol (**A-B**) and saccharin (**C-D**) 2BC sessions following chemogenetic inhibition of PSTN *Crh* neurons in CIE-exposed mice. There were no significant main effects of CNO or CIE on either of these measures.

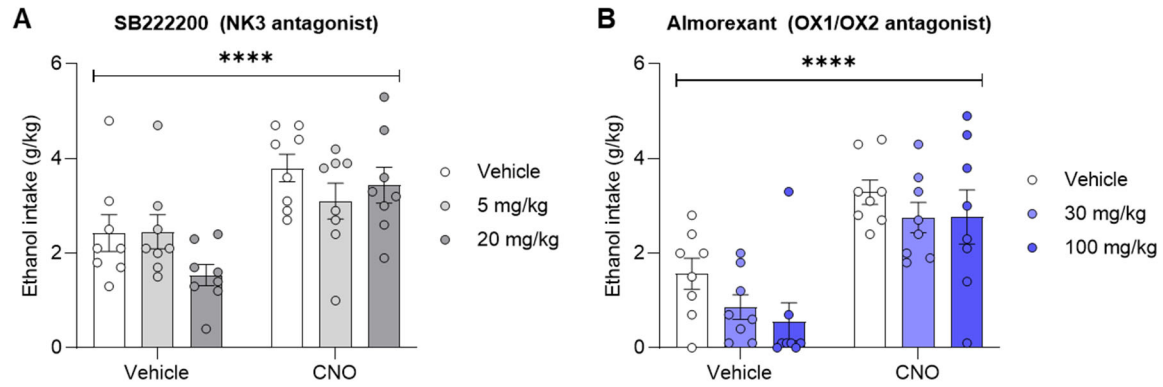

**Supplementary Figure 5.** Ethanol intake following combined administration of SB222200 (**A**) or almorexant (**B**) (between-subjects) and CNO (within-subjects) 30 min prior to 2BC. Main effect of CNO: \*\*\*\*,  $p < 0.0001$ . The main effect of ligand and CNO x ligand interaction were not significant for either compound.

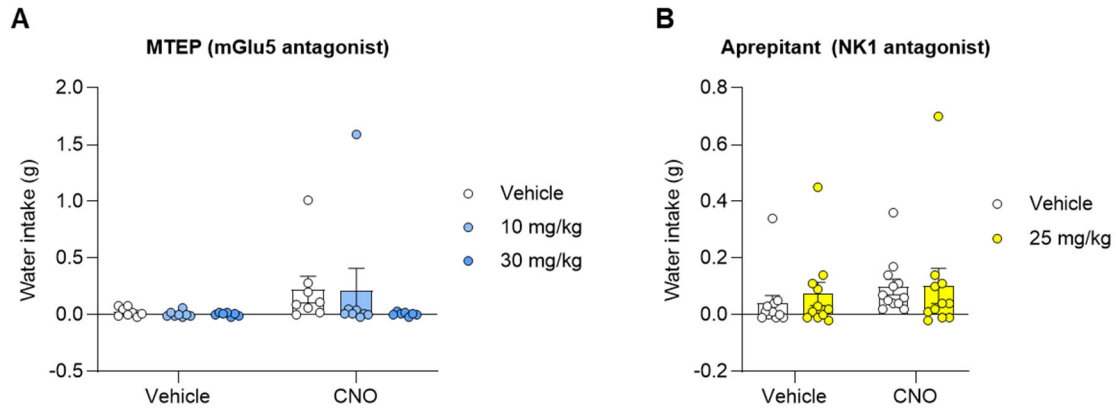

**Supplementary Figure 6.** Water intake following combined administration of MTEP (**A**) or aprepitant (**B**) (between-subjects) and CNO (within-subjects) 30 min prior to alcohol 2BC. The main effects and interaction were not significant for either compound.

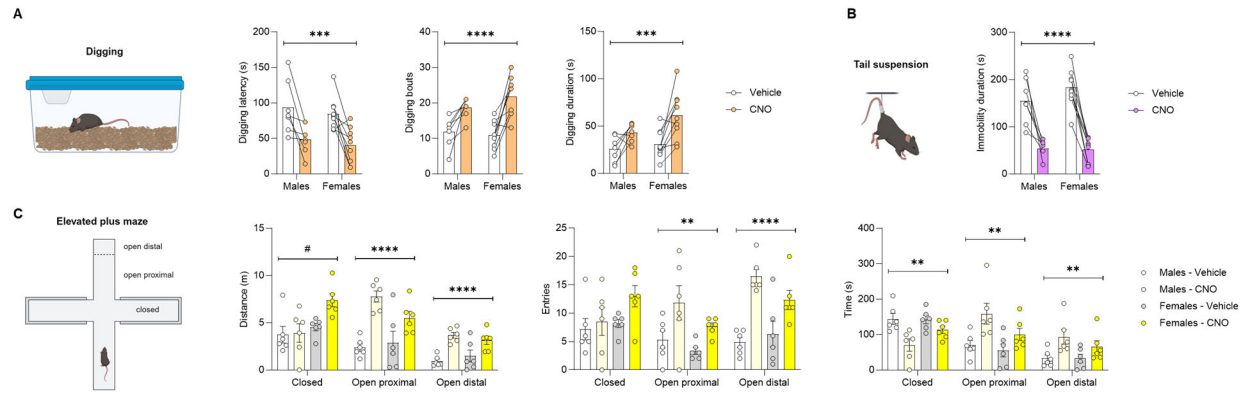

**Supplementary Figure 7.** *Crh*-Cre mice were injected with a Cre-dependent hM3Dq-encoding vector in the PSTN. Digging (**A**), tail suspension (**B**), and elevated plus-maze (**C**) tests were conducted 30 min after CNO administration. Main effect of CNO: \*,  $p < 0.05$ ; \*\*,  $p < 0.01$ ; \*\*\*,  $p < 0.001$ ; \*\*\*\*,  $p < 0.0001$ . Main effect of sex: #,  $p < 0.05$ .

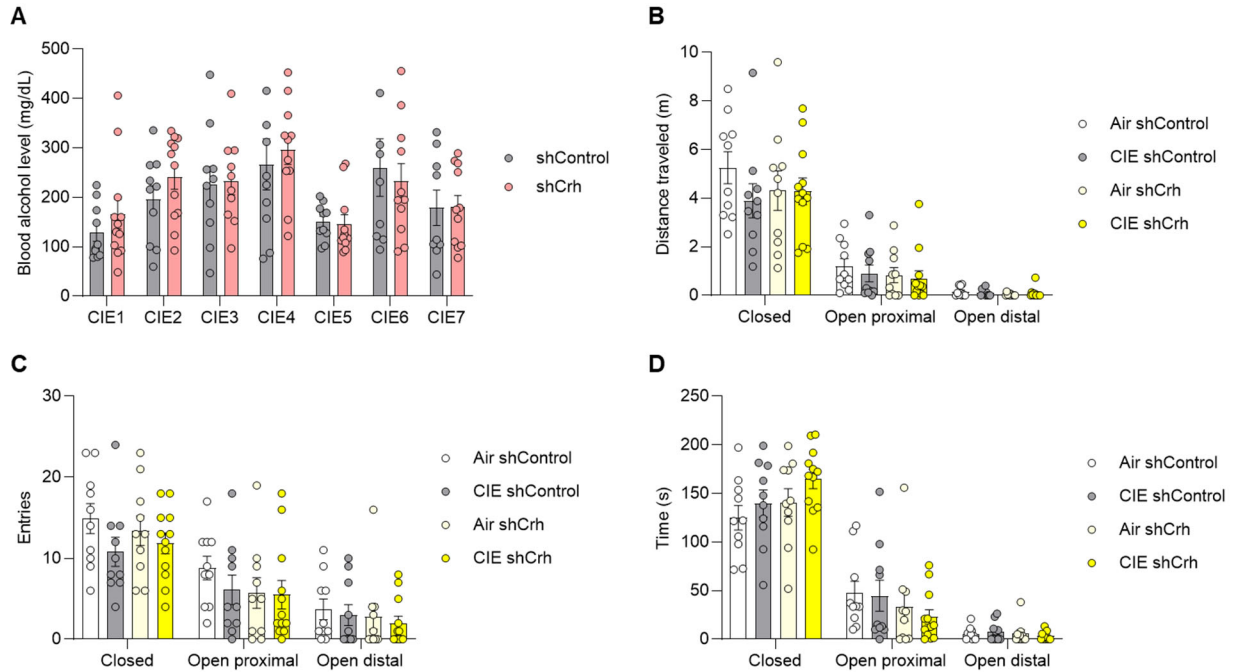

**Supplementary Figure 8.** C57BL/6J mice were injected in the PSTN with a vector encoding an shRNA targeting *Crh* (shCrh) or a control shRNA sequence (shControl) and subjected to the CIE-2BC paradigm. **A.** Blood alcohol levels measured on each week of CIE exposure were similar in the two shRNA groups. **B-D.** Mice were tested in the elevated plus-maze 6 days after CIE week 6. There were no significant effects of vapor or vector on distance (**B**), entries (**C**), or time (**D**) in any of the maze compartments.
